# Supplementary material for: A Light/Pressure Bifunctional Electronic Skin Based on a Bilayer Structure of PEDOT:PSS-Coated Cellulose Paper/CsPbBr3 QDs Film
Source: MDPI journal article supplement (doi:10.3390/polym15092136), 2023-04-29
Supplement: s1 [file s1]

# A Light/Pressure Bifunctional Electronic Skin Based on a Bilayer Structure of PEDOT:PSS-Coated Cellulose Paper/CsPbBr<sub>3</sub> QDs Film

Wenhao Li <sup>1</sup>, Jingyu Jia <sup>1</sup>, Xiaochen Sun <sup>1</sup>, Sue Hao <sup>1,\*</sup> and Tengling Ye <sup>1,2,\*</sup>

<sup>1</sup> Department of Applied Chemistry, School of Chemistry and Chemical Engineering, Harbin Institute of Technology, Harbin 150001, China; liwenhao0824@163.com (W.L.); jjy271828@163.com (J.J.); 15684172397@163.com (X.S.)

<sup>2</sup> CAS Key Laboratory of Renewable Energy, Guangzhou Institute of Energy Conversion, Guangzhou 510640, China

\* Correspondence: haosue@hit.edu.cn (S.H.); ytl@hit.edu.cn (T.Y.)

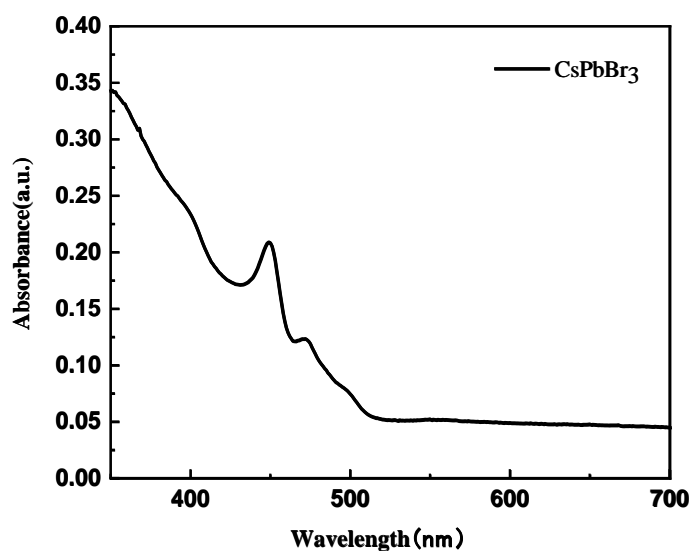

**Figure S1.** The absorption spectrum of CsPbBr<sub>3</sub> QDs in n-hexane solution.

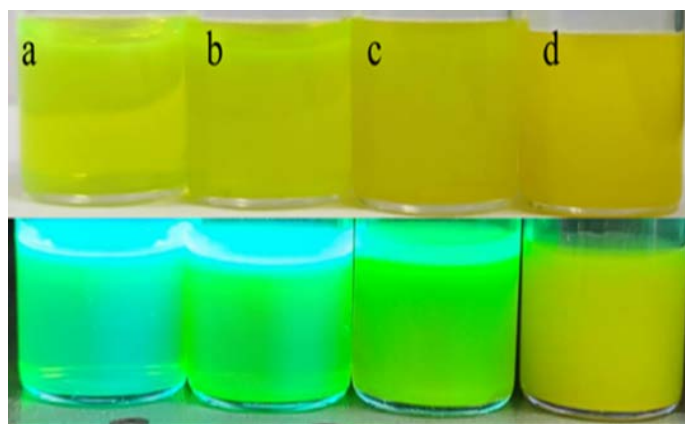

**Figure S2.** Solutions of CsPbBr<sub>3</sub> QDs washed by different solvents under fluorescent lamps (upper photos) and under 365 nm UV lamps (lower photos): (a) without washing; (b) washed by ethyl acetate; (c) washed by isopropanol; (d) washed by acetone.

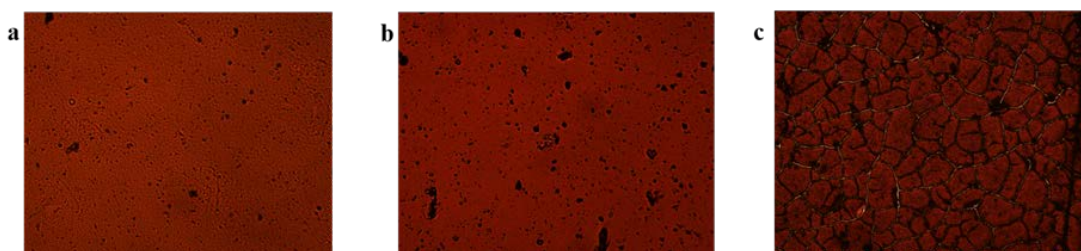

**Figure S3.** Microscopic morphologies of photodetectors washed by different solvents: (a) ethyl acetate, (b) isopropyl alcohol, (c) acetone (160x magnification).

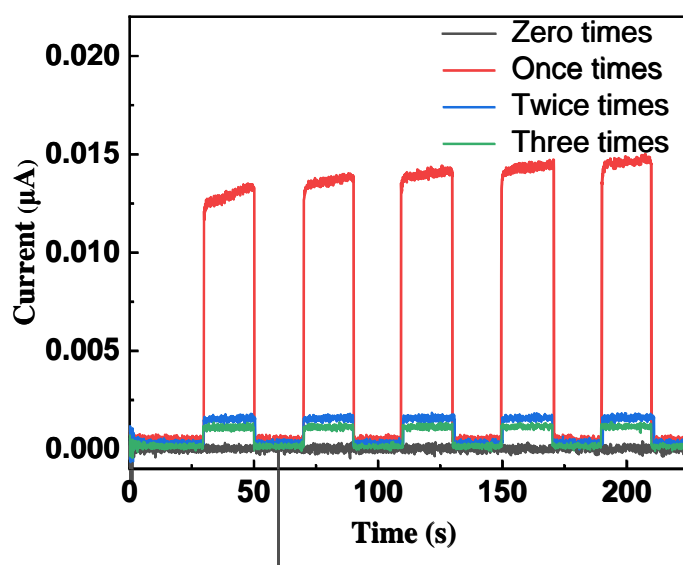

**Figure S4.** I-t curves of photodetectors under different washing times (405 nm, 10v) .

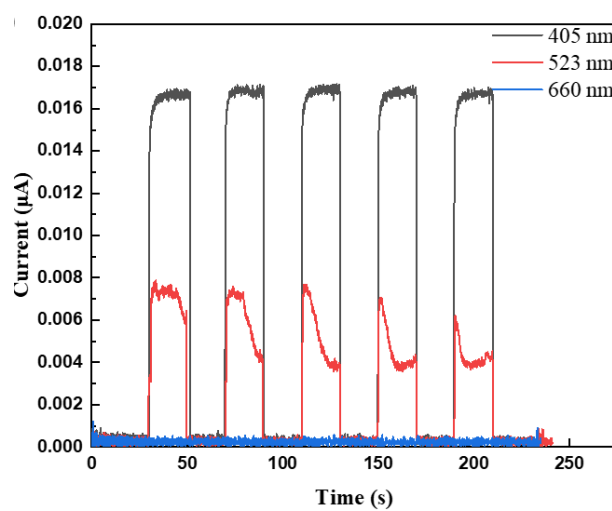

**Figure S5.** I-t curves of photodetectors under different wavelengths (40 mW/cm<sup>2</sup>, 10v).

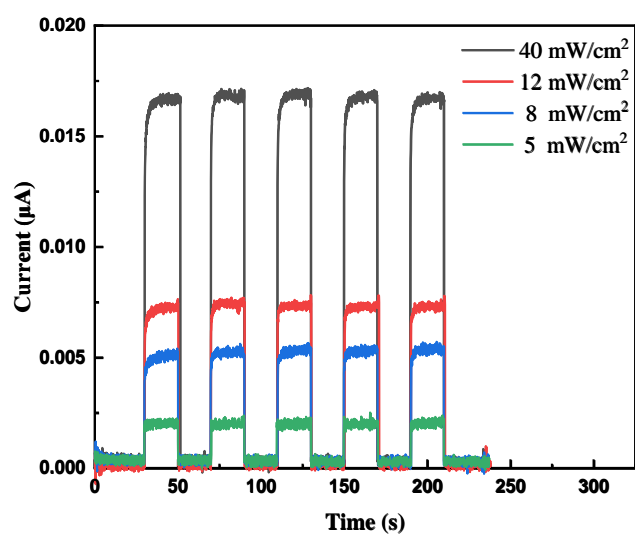

Figure S6. I-t curves of photodetectors under different optical power density (405 nm, 40  $\text{mW}/\text{cm}^2$ ).

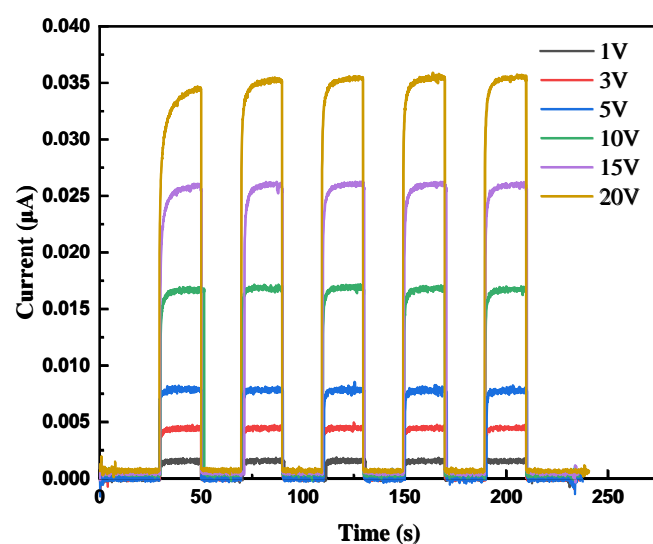

Figure S7. I-t curves of photodetectors at different voltages (405 nm, 10v).

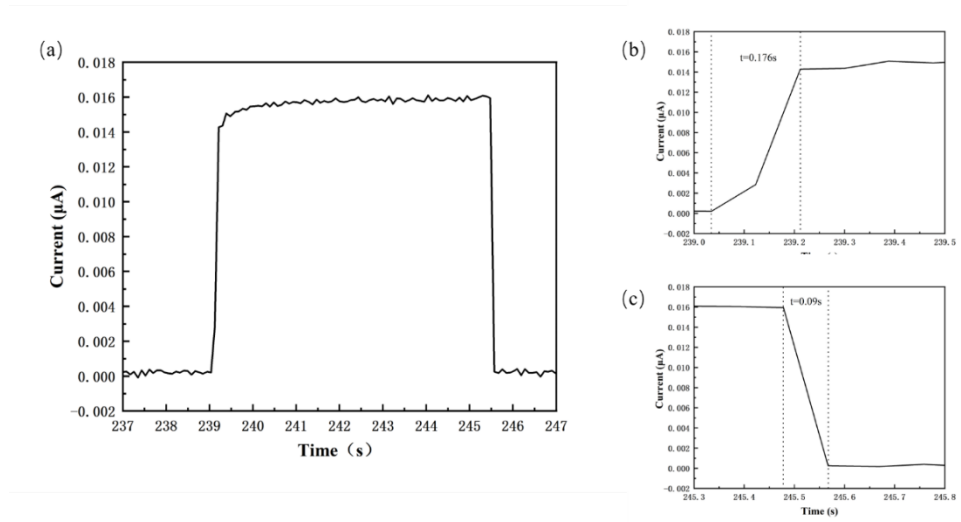

**Figure S8.** One cycle of photodetector and its response time (b is light on and c is light off) .

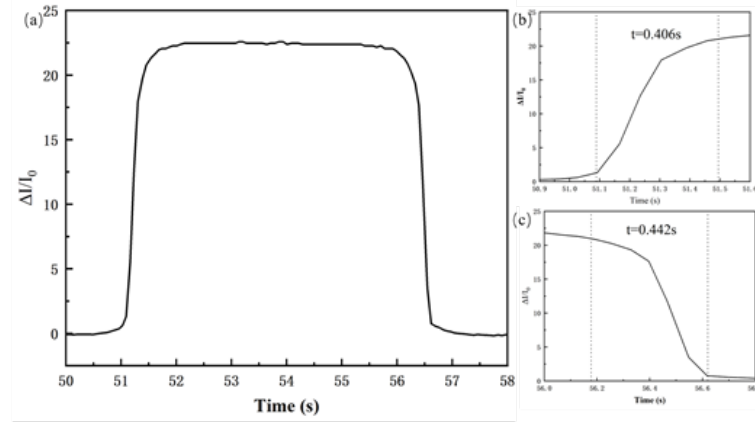

**Figure S9.** One cycle of pressure sensor and its response time (b is pressure on and c is pressure off) .

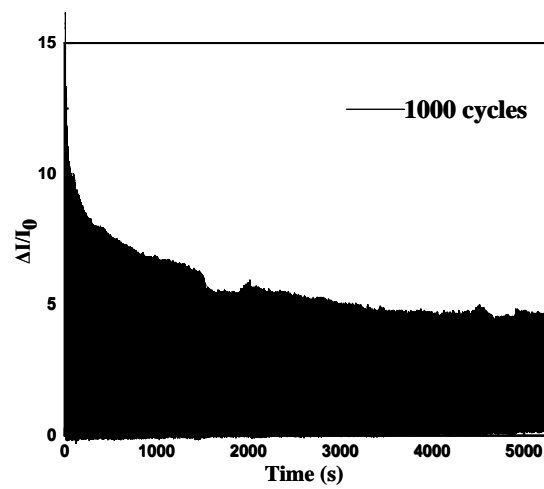

**Figure S10.**  $\Delta I/I_0$  vs  $t$  curves of the pressure sensor (1000 cycles); all applied bias is 1 v.
